# Supplementary material for: Recovery of Synthetic Zika Virus Based on Rio-U1 Isolate Using a Genetically Stable Two Plasmid System and cDNA Amplification
Source: PubMed Central journal article supplement (PMC7943741; doi:10.3389/fmicb.2021.639655), 2021-02-24
Supplement: Data_Sheet_2.pdf [file Data_Sheet_2.pdf]

Supplementary information of “**Recovery of synthetic Zika virus based on Rio-U1 isolate using a genetically stable two plasmid system and cDNA amplification**”

**Iasmim Silva de Mello<sup>1&</sup>, Déberli Ruiz Fernandes<sup>1&</sup>, Nathália Dias Furtado<sup>1</sup>, Alexandre Araújo Cunha dos Santos<sup>1</sup>, Marta Pereira dos Santos<sup>1</sup>, Ieda Pereira Ribeiro<sup>1</sup>, Lidiane Menezes Souza Raphael<sup>1</sup>, Mônica da Silva Nogueira <sup>2</sup>, Stephanie Oliveira Diaz da Cruz<sup>1</sup>, Adalgiza da Silva Rocha<sup>3</sup>, Pedro Paulo de Abreu Manso <sup>4</sup>, Marcelo Pelajo Machado<sup>4</sup> and Myrna Cristina Bonaldo<sup>1\*</sup>**

<sup>1</sup>Laboratório de Biologia Molecular de Flavivírus, Instituto Oswaldo Cruz, Fundação Oswaldo Cruz, Rio de Janeiro, Brazil

<sup>2</sup>Centro de Experimentação Animal, Instituto Oswaldo Cruz – FIOCRUZ

<sup>3</sup>Central Analítica, Unidade de Apoio ao Diagnóstico do COVID-19 - UNADIG-RJ, Vice-Presidência em Produção e Inovação - FIOCRUZ

<sup>4</sup>Laboratório de Patologia, Instituto Oswaldo Cruz, Fundação Oswaldo Cruz, Rio de Janeiro, Brazil

**\* Correspondence:**

Myrna Cristina Bonaldo

[mbonaldo@ioc.fiocruz.br](mailto:mbonaldo@ioc.fiocruz.br)

**Supplemental Table 1.** Set of primers employed in part or the entire ZIKV cDNA template amplification.

| Target        | Primer | Sequence 5' → 3'                               | Amplicon (bp) |
|---------------|--------|------------------------------------------------|---------------|
| pCC1-MCS-Z1Z2 | 1F     | CCTAAGCTTAGGTACCTTGCAAGGTCC<br>ATC             | 8255          |
|               | 1R     | GCTTAGGATCCGAGCTCACGCGTCTGT<br>ACC             |               |
| pCC1-Z3Z4     | 2F     | GGATGTGCTGCAAGGCGATTAAGTTGG                    | 7456          |
|               | 2R     | CTCGTATGTTGTGTGGAATTGTGAGC                     |               |
| IC.Rio-U1     | 3F     | CCTTATGTATCATAACATAACGATTTAG<br>GTGACACTATAGAG | 10847         |
|               | 3R     | AGACCCATGGATTTCCCCACACCGG                      |               |

**Supplemental Table 2** – Primer set designed for RT-PCR and viral genome sequencing.

| Primer    | Position    | Sequence 5' → 3'          |
|-----------|-------------|---------------------------|
| ZK1F      | 1 - 25      | AGTTGTTGATCTGTGTGAATCAGAC |
| ZKGAP5'AR | 166 - 182   | GCTCACACGGGCTACTC         |
| ZK1AR     | 623 – 644   | ATCCAGCATAGGGCATTTCATAG   |
| ZK1AF     | 627 – 646   | GAATGCCCTATGCTGGATGA      |
| ZK1BF     | 982 – 1003  | GGTGCATAGGAGTCAGCAATAG    |
| ZK1BR     | 1007 – 1028 | ACCTGACATACCTTCCACAAAG    |
| ZK1CR     | 1202 – 1221 | GGTAGGCTTCACCTTGTGTT      |
| ZK1CF     | 1373 – 1395 | AGAGAATCTGGAGTACCGGATAA   |
| ZK2F      | 1732 – 1751 | GGCAAACGTGTCGTGGTTCTA     |
| ZK1R      | 1872 – 1892 | GTATGACACGCCCTTCAATCT     |
| ZK2AF     | 2431 – 2450 | CCCTTATGTGCTTGGCCTTA      |
| ZK2AR     | 2434 – 2453 | CCCTAAGGCCAAGCACATAA      |
| ZK24L1F   | 2608 – 2626 | GTAGATTGGCAGCAGCAGT       |
| ZK2BR     | 2731 – 2751 | CCGTCAGTTGAACTCCATTCT     |
| ZK24L1R   | 2927 – 2948 | AAAGCTGTTCCATGCTCTATGT    |
| ZK3F      | 3085 – 3107 | GCTACTGGATTGAGAGTGAGAAG   |
| ZK2R      | 3364 – 3385 | CTCAGAGATGGTCCTCTTGTTT    |
| ZK3AR     | 3743 – 3764 | ATCTCCTCCAGTGTTTCATTTC    |
| ZK24L2F   | 3807 – 3827 | GCGTTGCTGGTATCTTTCATC     |
| ZK3AF     | 3972 – 3992 | GTTGTTCCACGCACTGATAAC     |
| ZK24L2R   | 4045 – 4061 | TGCTCTCCACGCCACAA         |
| ZK4F      | 4345 – 4366 | GTTACGTGGTCTCAGGAAAGAG    |
| ZK3R      | 4548 – 4567 | GGGTATGGCTATTGGGTTTCAT    |
| ZK4BF     | 4715 – 4735 | ACAAGTTGGAGTGGGAGTTAT     |
| ZK4AR     | 5026 – 5047 | CTCCACACTTGTCTAGGATTG     |
| ZK4AF     | 5034 – 5055 | GACAAGTGTGGGAGAGTGATAG    |

|           |               |                                                                |
|-----------|---------------|----------------------------------------------------------------|
| ZK4BR     | 5358 – 5377   | GTTCCAGAGTGGGTGACATT                                           |
| ZK5F      | 5593 – 5613   | CGGACTCCAACCTACCAATTA                                          |
| ZK4R      | 5912 – 5933   | GACTCTCTCGCCATCAAGTATG                                         |
| ZK5AR     | 6277 – 6299   | GCACCATCTTCTATCTGTGTAGG                                        |
| ZK5AF     | 6282 – 6304   | ACAGATAGAAGATGGTGCTTTGA                                        |
| ZK5BR     | 6518 – 6537   | TGGCTTCCTGGAATCTCTCT                                           |
| ZK6F      | 6959 – 6980   | TCTAATGGGAAGGAGAGAGGAG                                         |
| ZK5R      | 7104 – 7125   | CCATCGCCATTAAGGAGTAGTT                                         |
| ZK6AF     | 7607 – 7628   | CTTGGCTGGAGCTTCTCTAATC                                         |
| ZK6AR     | 7607 – 7628   | GATTAGAGAAGCTCCAGCCAAG                                         |
| ZK6BF     | 8018 - 8039   | AAGCTATGGGTGGAACATAGTC                                         |
| ZK6BR     | 8062 - 8081   | CTCAGCCGCCATATGAAAGA                                           |
| ZK7F      | 8549 – 8569   | CTTTGACGAGAACCACCCATA                                          |
| ZK6R      | 8689 – 8708   | GGTGTCCGTCATGGCTATTC                                           |
| ZK7AF     | 9187 – 9206   | GTGTTGAAGGGCTGGGATTA                                           |
| ZK7AR     | 9228 – 9249   | CTGGTATGCGACTCATCTCTTC                                         |
| ZK7BF     | 9514 – 9534   | ACCTAGTGGTGCAACTCATTC                                          |
| ZK7BR     | 9537 – 9558   | GAACCTTCCTCAGCCTCCATATT                                        |
| ZK8F      | 10034 – 10054 | GGTTCCAACCTGGGAGAACTAC                                         |
| ZK7R      | 10205 – 10227 | CTATGAGAGATCCACACCACAAG                                        |
| ZKGAP3'F  | 10643 – 10664 | TGGATCTCCAGAAGAGGGACTA                                         |
| ZK8R      | 10788 – 10807 | AGACCCATGGATTTCCCCAC                                           |
| zkmelt65f | 10034 - 10068 | GGTTCCAACCTGGGAGAACTACCTGGTCAATCCATG                           |
| zkmelt65r | 10782 - 10807 | AGACCCATGGATTTCCCCACACCGGC                                     |
| zkmelt70f | 10034 - 10090 | GGTTCCAACCTGGGAGAACTACCTGGTCAATCCATG<br>GAAAGGGAGAATGGATGACCAC |
| zkmelt70r | 10778-10807   | AGACCCATGGATTTCCCCACACCGGCCGCC                                 |

**Supplemental Table 3 - Clinical scores for monitoring signs of disease in AG129 mice**

| <b>Observation</b>                                                                      | <b>Score</b>                                                     |
|-----------------------------------------------------------------------------------------|------------------------------------------------------------------|
| <b>Body weight</b>                                                                      |                                                                  |
| Loss of 5-10%                                                                           | 1                                                                |
| Loss of 10-15%                                                                          | 2                                                                |
| Loss of 16-20%                                                                          | 3                                                                |
| Loss of 20% or more                                                                     | 6                                                                |
| <b>Fur</b>                                                                              |                                                                  |
| Slightly ruffled                                                                        | 2                                                                |
| Evidently ruffled                                                                       | 3                                                                |
| <b>Respiration</b>                                                                      |                                                                  |
| Accelerated breathing (tachypnea)                                                       | 1                                                                |
| Difficult breathing (dyspnea)                                                           | 3                                                                |
| <b>Clinical complications</b>                                                           |                                                                  |
| Tension during handling                                                                 | 1                                                                |
| Tremors, breath noises, aggression, vocalizations                                       | 3                                                                |
| <b>Motility</b>                                                                         |                                                                  |
| Abnormal walking and posture (slightly hunched, reduced activity)                       | 1                                                                |
| Massively abnormal walking and posture (evidently hunched, moderately reduced activity) | 2                                                                |
| Motility only after stimulation, isolation, lethargy                                    | 3                                                                |
| No activity for more than 24 hours                                                      | 6                                                                |
| <b>Measures according to total score</b>                                                |                                                                  |
| <b>3</b>                                                                                | Animals are carefully observed, with monitoring 2 times a day    |
| <b>6</b>                                                                                | Implementation of humane endpoint, abort experiment (euthanasia) |
